# Supplementary material for: Real-time assessment of high-intensity focused ultrasound heating and cavitation with hybrid optoacoustic ultrasound imaging
Source: PubMed Central journal article supplement (PMC10203775; doi:10.1016/j.pacs.2023.100508), 2023-05-10
Supplement: mmc1.pdf [file mmc1.pdf]

31 **Supplementary Figures:**

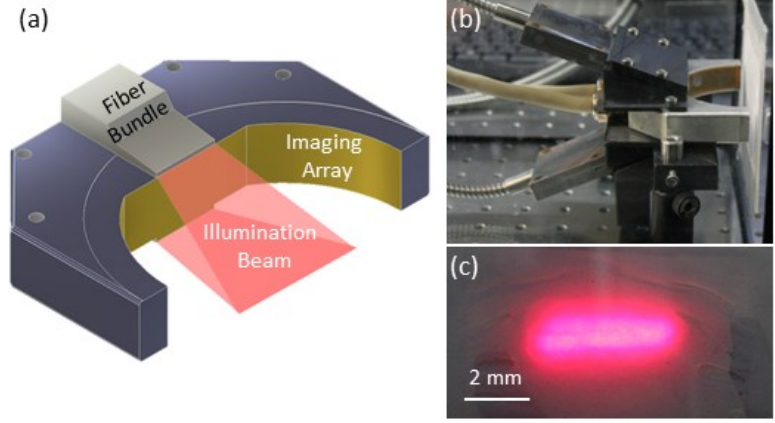

32

33 **Supplementary Fig. S1.** Light profile at the tissue surface for the OPUS imaging array. (a) 3D rendering  
34 of the multi-segment hybrid imaging array, including the illumination fiber bundle. (b) Actual photograph  
35 of the multi-segment hybrid imaging probe with the attached illumination fiber bundle. (c) Light profile  
36 created by the fiber bundle attached to the multi-segment imaging array at the approximate location of the  
37 tissue surface.

38

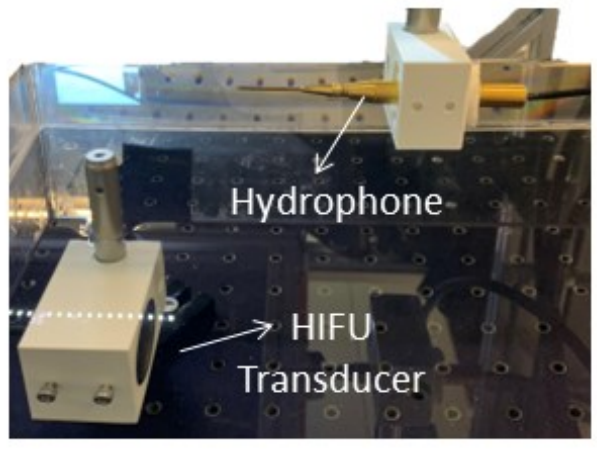

39

40 **Supplementary Fig. S2.** Actual photograph of the calibrated hydrophone. The photograph was taken while  
41 scanning towards the HIFU transducer focus to measure the acoustic pressure (MPa) as a function of the  
42 peak-to-peak voltage ( $V_{pp}$ ).

43

44

45

46

47

48

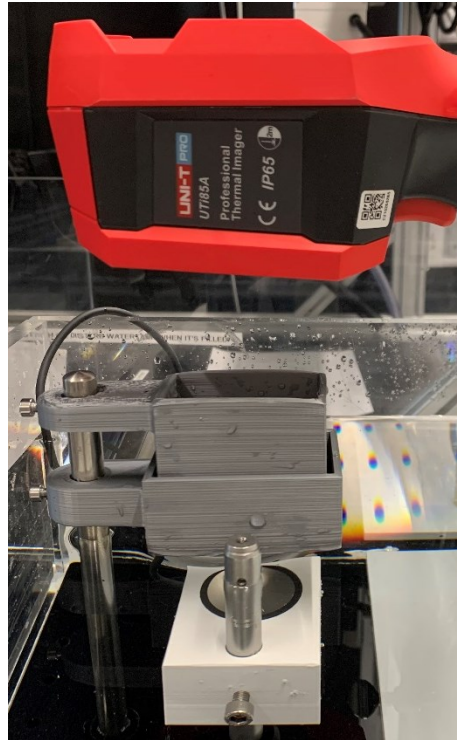

49

50 **Supplementary Fig. S3.** Experimental setup of the thermal camera measurements during HIFU ablation.

51

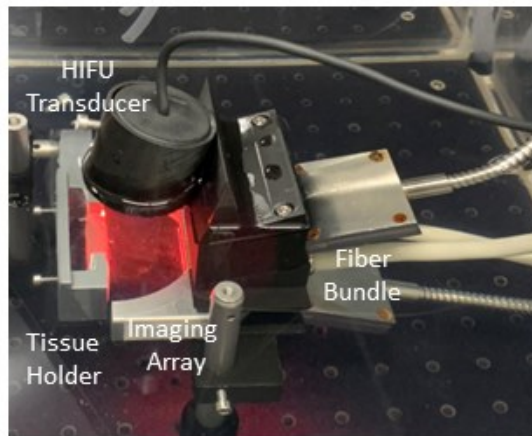

52

53 **Supplementary Fig. S4.** Experimental setup of the OPUS visualization of HIFU lesion progression in fixed  
54 *ex vivo* liver specimens.
